# Supplementary material for: Identification of NPF Family Genes in Brassica rapa Reveal Their Potential Functions in Pollen Development and Response to Low Nitrate Stress
Source: MDPI journal article supplement (doi:10.3390/ijms24010754), 2023-01-01
Supplement: s1 [file s1]

**Table S2.** Conserved motifs identified in BrNPF proteins.

| Motif No. | Motif consensus sequence                                                            | <i>E</i> -value | Motif Width | No. of <i>BrNPF</i> proteins | Motif annotation      |
|-----------|-------------------------------------------------------------------------------------|-----------------|-------------|------------------------------|-----------------------|
| 1         |    | 6.3e-1603       | 41          | 75                           | PTR2 domain (PF00854) |
| 2         |    | 1.4e-873        | 24          | 72                           | PTR2 domain (PF00854) |
| 3         |    | 7.6e-816        | 24          | 71                           | PTR2 domain (PF00854) |
| 4         |    | 2.5e-1022       | 29          | 77                           | PTR2 domain (PF00854) |
| 5         |   | 1.7e-578        | 22          | <b>78</b>                    | PTR2 domain (PF00854) |
| 6         |  | 4.9e-572        | 19          | 74                           | PTR2 domain (PF00854) |
| 7         |  | 1.1e-918        | 29          | <b>73</b>                    | —                     |

|    |                                                                                   |          |    |    |                       |
|----|-----------------------------------------------------------------------------------|----------|----|----|-----------------------|
| 8  |  | 2.9e-530 | 15 | 71 | —                     |
| 9  |  | 1.2e-517 | 21 | 65 | —                     |
| 10 |  | 1.4e-555 | 21 | 72 | PTR2 domain (PF00854) |
